# Supplementary material for: Synthesis, spectroscopic, SC-XRD/DFT and non-linear optical (NLO) properties of chromene derivatives
Source: Royal Society of Chemistry journal article supplement (doi:10.1039/d2ra07134g), 2022-12-21
Supplement: d2ra07134g1.pdf [file d2ra07134g1.pdf]

## Synthesis, Spectroscopic, SC-XRD/DFT and Non-Linear Optical (NLO) Properties of Chromene Derivatives

Nadia Arif,<sup>1</sup> Zahid Shafiq,<sup>1\*</sup> Sajida Noureen,<sup>2</sup> Muhammad Khalid,<sup>3,4\*</sup> Abida Ashraf<sup>1</sup>, Muhammad Yaqub,<sup>1</sup> Shabana Irshad<sup>3,4</sup> Muhammad Usman Khan,<sup>5</sup> Muhammad Nadeem Arshad,<sup>6</sup> Ataulpa Albert Carmo Braga,<sup>7</sup> Ahmed H. Ragab<sup>8</sup> and Saedah R. Al-Mhyawi<sup>9</sup>

<sup>1</sup>Institute of Chemical Sciences, Organic Chemistry Division, Bahauddin Zakariya University, Multan-60800, Pakistan

<sup>2</sup>Materials Chemistry Laboratory, Institute of Chemistry, The Islamia University of Bahawalpur, 63100, Pakistan

<sup>3</sup>Institute of Chemistry, Khwaja Fareed University of Engineering & Information Technology, Rahim Yar Khan, 64200, Pakistan

<sup>4</sup>Centre for Theoretical and Computational Research, Khwaja Fareed University of Engineering & Information Technology, Rahim Yar Khan, 64200, Pakistan

<sup>5</sup>Department of Chemistry, University of Okara, Okara-56300, Pakistan

<sup>6</sup>Center of Excellence for Advanced Materials Research (CEAMR) Faculty of Science, King Abdulaziz University, Jeddah, Saudi Arabia

<sup>7</sup>Departamento de Química Fundamental, Instituto de Química, Universidade de São Paulo, Av. Prof. Lineu Prestes 748, São Paulo, 05508-000, Brazil

<sup>8</sup>Department of Chemistry, Faculty of Science, King Khalid University, Abha 62224, Saudi Arabia

<sup>9</sup>Department of Chemistry, College of Science, University of Jeddah, Jeddah 21419, Saudi Arabia

Dr. Zahid Shafiq: [zahidshafiq25@hotmail.com](mailto:zahidshafiq25@hotmail.com)

Dr. Muhammad Khalid: [khalid@iq.usp.br](mailto:khalid@iq.usp.br); [mohammad.khalid@kfueit.edu.pk](mailto:mohammad.khalid@kfueit.edu.pk)

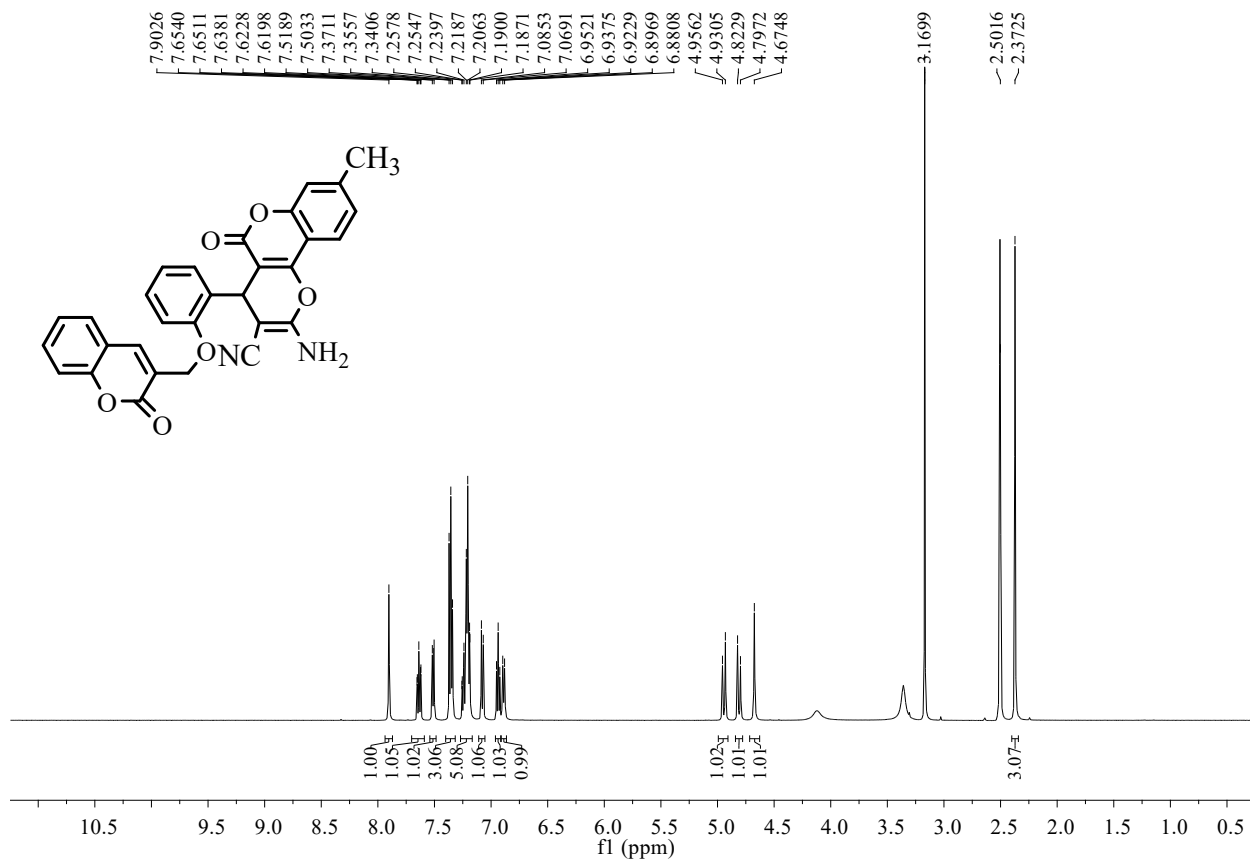

**Figure S1:** <sup>1</sup>H NMR spectrum of compound 4a

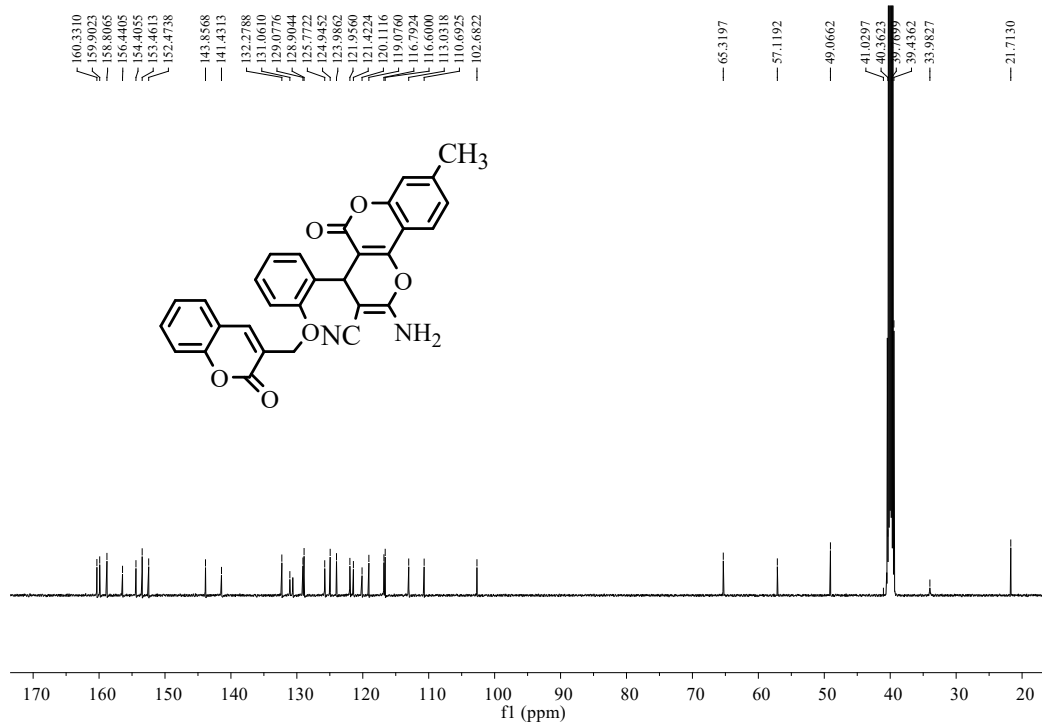

**Figure S2:**  $^{13}\text{C}$  NMR spectrum of compound 4a

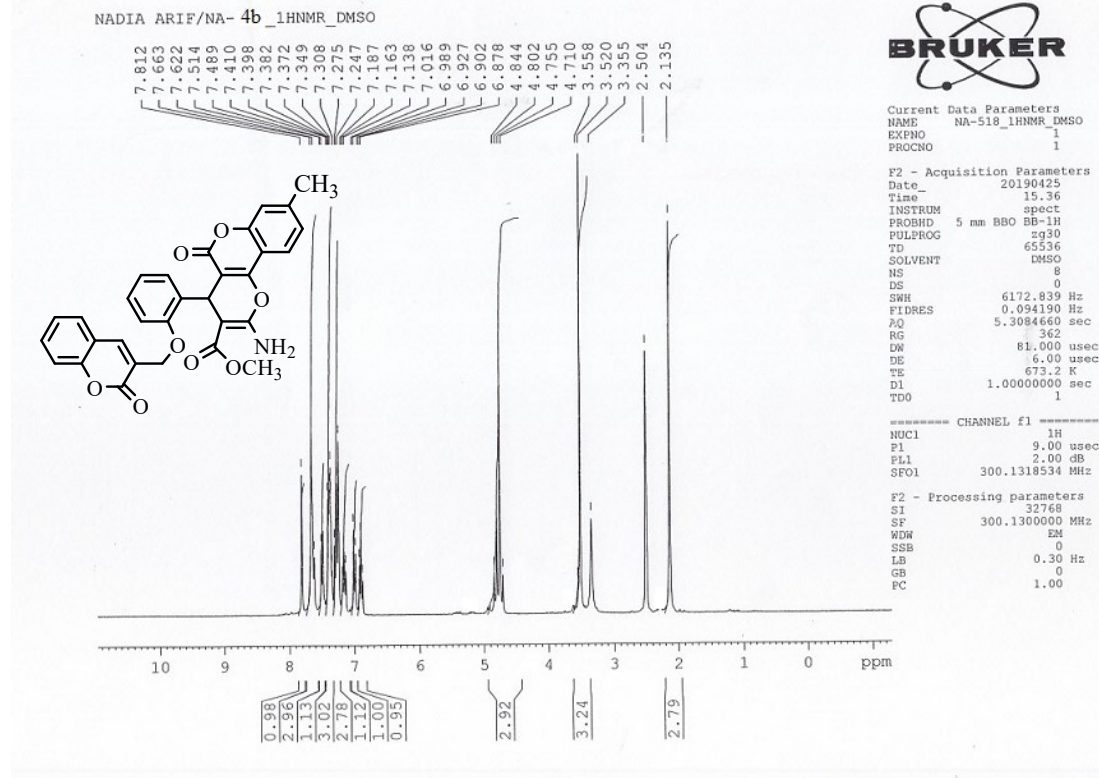

Figure S3:  $^1\text{H}$  NMR spectrum of compound 4b

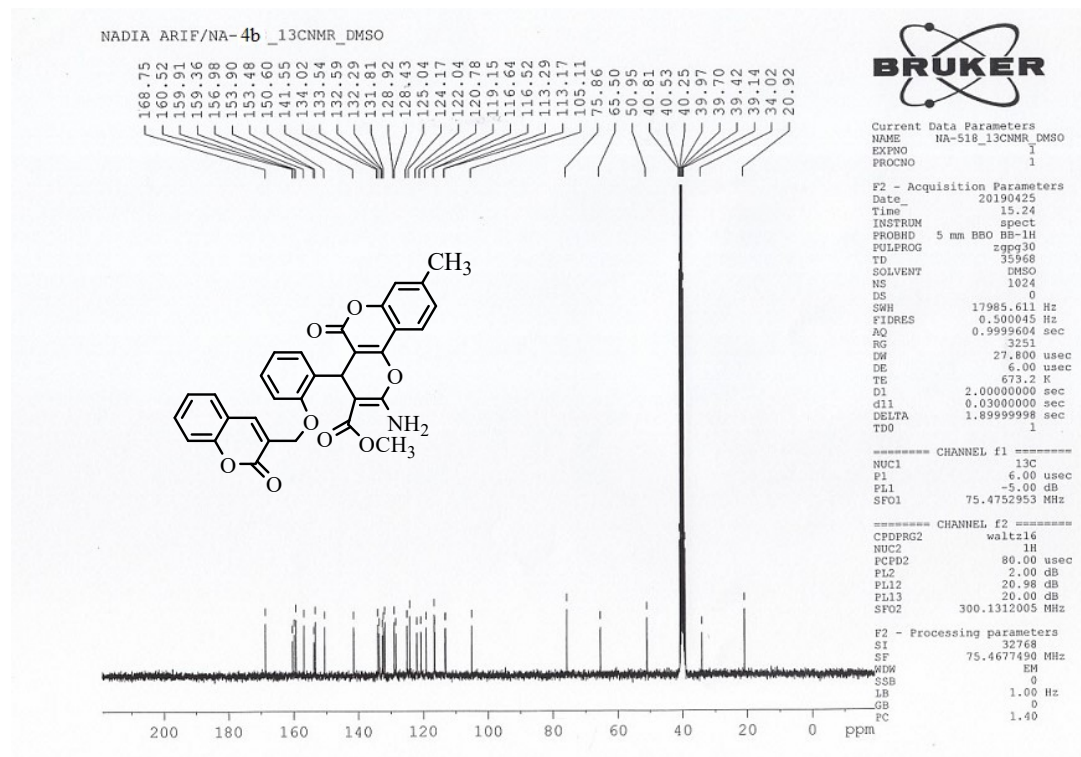

Figure S4:  $^{13}\text{C}$  NMR spectrum of compound 4b

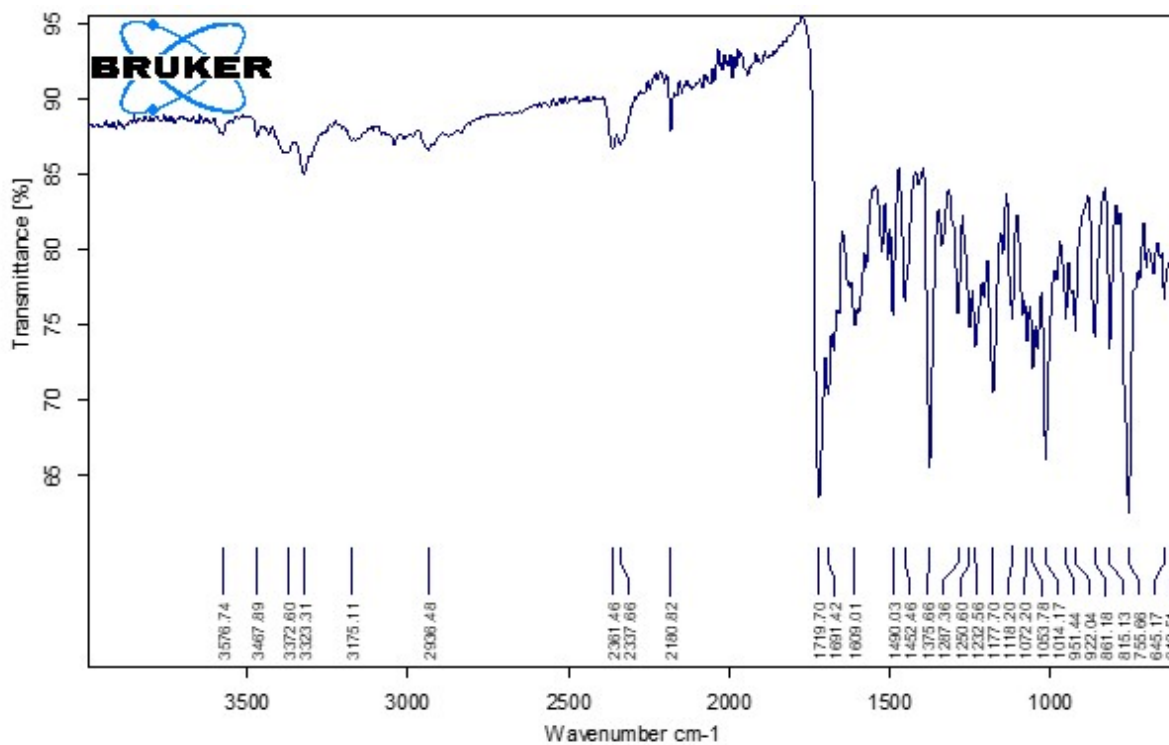

Figure S5: IR spectrum of **4a** compound

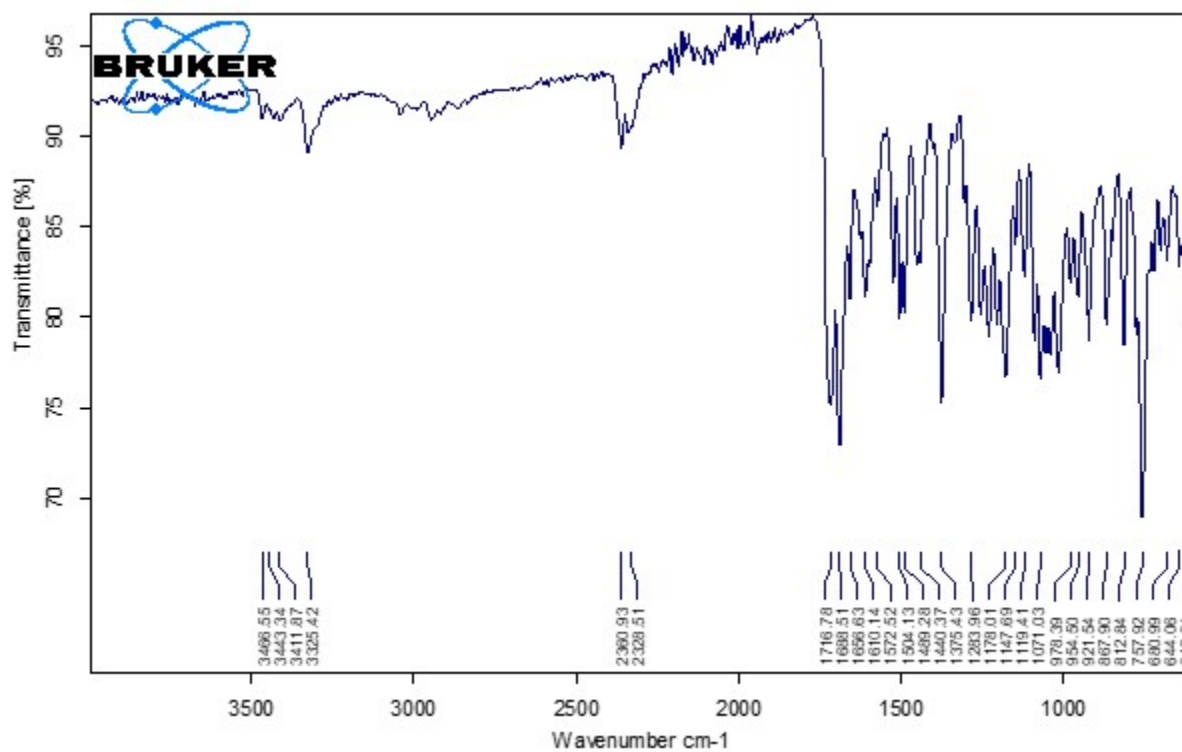

Figure S6: IR spectrum of **4b** compound

**Table S1:** Comparison of selected bond lengths (Å) and angles (°) of **4a**

| <b>Bond Lengths</b> |            |            | <b>Bond Angles</b> |            |            |
|---------------------|------------|------------|--------------------|------------|------------|
|                     | <b>DFT</b> | <b>XRD</b> |                    | <b>DFT</b> | <b>XRD</b> |
| O1-C10              | 1.355      | 1.366(3)   | C10-O1-C15         | 118.3      | 118.5      |
| O1-C15              | 1.366      | 1.368(3)   | O1-C10-C11         | 123.7      | 123.2      |
| N2-C15              | 1.342      | 1.344(3)   | O1-C10-C12         | 114.1      | 113.4      |
| O3-C20              | 1.368      | 1.373(3)   | O1-C15-N2          | 110.4      | 109.8      |
| O3-C22              | 1.364      | 1.375(3)   | O1-C15-C14         | 121.9      | 122.1      |
| O4-C9               | 1.369      | 1.372(3)   | N2-C15-C14         | 127.6      | 128        |
| O4-C31              | 1.415      | 1.431(3)   | C20-O3-C22         | 122.8      | 122.6      |
| O5-C17              | 1.36       | 1.381(3)   | O3-C20-O7          | 117.6      | 116.4      |
| O5-C18              | 1.385      | 1.387(3)   | O3-C20-C26         | 117.6      | 117.8      |
| O6-C18              | 1.202      | 1.202(3)   | O3-C22-C29         | 120.9      | 120.1      |
| O7-C20              | 1.211      | 1.204(3)   | O3-C22-C35         | 117.3      | 117.5      |
| C8-C9               | 1.403      | 1.395(3)   | C9-O4-C31          | 117.2      | 118.3      |
| C8-C16              | 1.521      | 1.527(3)   | O4-C9-C8           | 116        | 115        |
| C8-C24              | 1.389      | 1.385(3)   | O4-C9-C21          | 123.2      | 124        |
| C9-C21              | 1.393      | 1.387(3)   | O4-C31-C26         | 108.8      | 106.2      |
| C10-C11             | 1.347      | 1.34(3)    | C17-O5-C18         | 122.6      | 121.9      |
| C10-C12             | 1.444      | 1.436(3)   | O5-C17-C12         | 121.7      | 120.9      |
| C11-C16             | 1.507      | 1.5(3)     | O5-C17-C27         | 117.6      | 117.7      |
| C11-C18             | 1.459      | 1.45(3)    | O5-C18-O6          | 117.9      | 116.6      |
| C12-C13             | 1.4        | 1.392(3)   | O5-C18-C11         | 117.2      | 118.1      |
| C12-C17             | 1.398      | 1.39(3)    | O6-C18-C11         | 124.9      | 125.3      |
| C13-C28             | 1.386      | 1.375(3)   | O7-C20-C26         | 124.8      | 125.9      |
| C14-C15             | 1.361      | 1.347(3)   | C9-C8-C16          | 121        | 121.8      |
| C14-C16             | 1.516      | 1.523(3)   | C9-C8-C24          | 118.4      | 117.7      |
| C14-C25             | 1.418      | 1.41(3)    | C8-C9-C21          | 120.7      | 120.9      |
| C17-C27             | 1.392      | 1.376(3)   | C16-C8-C24         | 120.5      | 120.4      |
| C19-C25             | 1.162      | 1.149(3)   | C8-C16-C11         | 113.6      | 114        |
| C20-C26             | 1.464      | 1.444(3)   | C8-C16-C14         | 111.8      | 111.7      |
| C21-C23             | 1.394      | 1.375(3)   | C8-C24-C32         | 121.5      | 121.6      |
| C22-C29             | 1.399      | 1.395(3)   | C9-C21-C23         | 119.6      | 119.2      |
| C22-C35             | 1.391      | 1.371(3)   | C11-C10-C12        | 122.3      | 123.4      |
| C23-C32             | 1.388      | 1.36(3)    | C10-C11-C16        | 122.4      | 123.2      |
| C24-C32             | 1.394      | 1.391(3)   | C10-C11-C18        | 119.6      | 118.6      |
| C26-C30             | 1.349      | 1.338(3)   | C10-C12-C13        | 124        | 125.1      |
| C26-C31             | 1.501      | 1.496(3)   | C10-C12-C17        | 116.5      | 116.8      |
| C27-C33             | 1.392      | 1.379(3)   | C16-C11-C18        | 118        | 118.2      |
| C28-C33             | 1.403      | 1.396(3)   | C11-C16-C14        | 108.2      | 108.2      |
| C29-C30             | 1.442      | 1.43(3)    | C13-C12-C17        | 119.5      | 118.1      |
| C29-C34             | 1.402      | 1.398(3)   | C12-C13-C28        | 119.5      | 120.3      |
| C33-C36             | 1.506      | 1.505(3)   | C12-C17-C27        | 120.8      | 121.5      |

|         |       |          |              |       |       |
|---------|-------|----------|--------------|-------|-------|
| C34-C38 | 1.384 | 1.374(3) | C13-C28-C33  | 121.1 | 121.1 |
| C35-C37 | 1.387 | 1.359(3) | C15-C14-C16) | 122.6 | 123.2 |
| C37-C38 | 1.401 | 1.378(3) | C15-C14-C25  | 117.2 | 117.9 |
| O39-C40 | 1.412 | 1.328(3) | C16-C14-C25  | 120   | 118.9 |

**Table S1 Continue:** Comparison of selected bond lengths (Å) and angles (°) of **4a**

|             | <b>Bond Angles</b> |            |
|-------------|--------------------|------------|
|             | <b>DFT</b>         | <b>XRD</b> |
| C14-C25-N19 | 177.9              | 178.7      |
| C17-C27-C33 | 119.9              | 120.4      |
| C20-C26-C30 | 119.6              | 119.9      |
| C20-C26-C31 | 116.9              | 115.9      |
| C21-C23-C32 | 120.4              | 121.5      |
| C29-C22-C35 | 121.8              | 122.4      |
| C22-C29-C30 | 117.5              | 117.7      |
| C22-C29-C34 | 118.5              | 117.5      |
| C22-C35-C37 | 118.6              | 118.9      |
| C23-C32-C24 | 119.4              | 118.9      |
| C30-C26-C31 | 123.5              | 124.2      |
| C26-C30-C29 | 121.3              | 121.9      |
| C27-C33-C28 | 119.2              | 118.5      |
| C27-C33-C36 | 120.3              | 121.2      |
| C28-C33-C36 | 120.5              | 120.3      |
| C30-C29-C34 | 124                | 124.8      |
| C29-C34-C38 | 120.4              | 119.7      |
| C34-C38-C37 | 119.9              | 120.9      |
| C35-C37-C38 | 120.8              | 120.6      |

**Table S2:** Comparison of selected bond lengths (Å) and angles (°) of **4b**

|        | <b>Bond Lengths</b> |            | <b>Bond Angles</b> |            |            |
|--------|---------------------|------------|--------------------|------------|------------|
|        | <b>DFT</b>          | <b>XRD</b> |                    | <b>DFT</b> | <b>XRD</b> |
| O1-C10 | 1.381               | 1.381(3)   | C10-O1-C32         | 114.7      | 118.6(2)   |
| O1-C32 | 1.418               | 1.421(3)   | O1-C10-C30         | 120        | 123.3(2)   |
| O2-C15 | 1.361               | 1.364(3)   | O1-C10-C35         | 118.9      | 115.6(2)   |
| O2-C16 | 1.364               | 1.377(3)   | O1-C32-C18         | 107.9      | 107.1(2)   |
| O3-C19 | 1.374               | 1.376(3)   | C15-O2-C16         | 118.8      | 118.7(2)   |
| O3-C27 | 1.362               | 1.378(3)   | O2-C15-C11         | 123.2      | 123.6(2)   |
| O4-C22 | 1.361               | 1.376(3)   | O2-C15-C14         | 114.5      | 113.5(2)   |
| O4-C24 | 1.38                | 1.387(3)   | O2-C16-N9          | 109.6      | 109.4(2)   |
| O5-C26 | 1.345               | 1.338(3)   | O2-C16-C13         | 123        | 122.1(2)   |
| O5-C40 | 1.425               | 1.436(3)   | C19-O3-C27         | 122.3      | 122.1(2)   |
| O6-C24 | 1.202               | 1.215(3)   | O3-C19-O7          | 118.4      | 116.5(2)   |
| O7-C19 | 1.205               | 1.202(3)   | O3-C19-C18         | 117        | 117.7(2)   |

|         |       |          |             |       |          |
|---------|-------|----------|-------------|-------|----------|
| O8-C26  | 1.224 | 1.222(3) | O3-C27-C21  | 121.3 | 120.6(2) |
| N9-C16  | 1.355 | 1.336(3) | O3-C27-C37  | 117.3 | 116.8(2) |
| C10-C30 | 1.393 | 1.385(3) | C22-O4-C24  | 122.6 | 121.3(2) |
| C10-C35 | 1.399 | 1.393(3) | O4-C22-C14  | 121.6 | 121.2(2) |
| C11-C12 | 1.505 | 1.512(3) | O4-C22-C25  | 117.4 | 117.4(2) |
| C11-C15 | 1.346 | 1.339(3) | O4-C24-O6   | 118.3 | 115.8(2) |
| C11-C24 | 1.462 | 1.439(3) | O4-C24-C11  | 117.1 | 118.5(2) |
| C12-C13 | 1.515 | 1.513(3) | C26-O5-C40  | 115.1 | 117.6(2) |
| C12-C35 | 1.526 | 1.534(3) | O5-C26-O8   | 121.6 | 121.7(2) |
| C13-C16 | 1.361 | 1.356(3) | O5-C26-C13  | 111.9 | 112.1(2) |
| C13-C26 | 1.455 | 1.449(3) | O6-C24-C11  | 124.6 | 125.7(2) |
| C14-C15 | 1.443 | 1.436(3) | O7-C19-C18  | 124.6 | 125.8(2) |
| C14-C20 | 1.402 | 1.391(3) | O8-C26-C13  | 126.5 | 126.2(2) |
| C14-C22 | 1.398 | 1.38(3)  | N9-C16-C13  | 127.5 | 128.5(2) |
| C17-C28 | 1.39  | 1.38(3)  | C30-C10-C35 | 121.1 | 121.1(2) |
| C17-C35 | 1.395 | 1.387(3) | C10-C30-C33 | 119.8 | 119.5(2) |
| C18-C19 | 1.47  | 1.452(3) | C10-C35-C12 | 121.6 | 122.8(2) |
| C18-C23 | 1.345 | 1.336(3) | C10-C35-C17 | 118   | 117.7(2) |
| C18-C32 | 1.499 | 1.493(3) | C12-C11-C15 | 122.8 | 121.9(2) |
| C20-C31 | 1.381 | 1.374(3) | C12-C11-C24 | 117.6 | 119.2(2) |
| C21-C23 | 1.444 | 1.43(3)  | C11-C12-C13 | 109.3 | 109.5(2) |
| C21-C27 | 1.4   | 1.383(3) | C11-C12-C35 | 110.7 | 111.9(2) |
| C21-C34 | 1.402 | 1.398(3) | C15-C11-C24 | 119.5 | 118.7(2) |
| C22-C25 | 1.392 | 1.391(3) | C11-C15-C14 | 122.2 | 122.9(2) |
| C25-C29 | 1.389 | 1.381(3) | C13-C12-C35 | 112.5 | 112.9(2) |
| C27-C37 | 1.393 | 1.383(3) | C12-C13-C16 | 121.8 | 122.3(2) |
| C28-C33 | 1.393 | 1.372(3) | C12-C13-C26 | 120.1 | 120.2(2) |
| C29-C31 | 1.406 | 1.393(3) | C12-C35-C17 | 120.4 | 119.5(2) |
| C29-C36 | 1.504 | 1.501(3) | C16-C13-C26 | 118.1 | 117.5(2) |
| C30-C33 | 1.39  | 1.383(3) | C15-C14-C20 | 124.4 | 124.3(2) |
| C34-C38 | 1.385 | 1.363(3) | C15-C14-C22 | 116.4 | 116.9(2) |
| C37-C39 | 1.387 | 1.374(3) | C20-C14-C22 | 119   | 118.7(2) |
| C38-C39 | 1.4   | 1.377(3) | C14-C20-C31 | 119.9 | 120.3(2) |

**Table S2 Continue:** Comparison of selected bond lengths (Å) and angles (°) of **4b**

| <b>Bond Angles</b> |            |            |
|--------------------|------------|------------|
|                    | <b>DFT</b> | <b>XRD</b> |
| C28-C17-C35        | 121.4      | 121.7(2)   |
| C17-C28-C33        | 119.8      | 119.4(3)   |
| C19-C18-C23        | 120.8      | 119.5(3)   |
| C19-C18-C32        | 115.4      | 117.9(3)   |
| C23-C18-C32        | 123.7      | 122.5(3)   |
| C18-C23-C21        | 120.3      | 122.3(3)   |



|             |       |          |
|-------------|-------|----------|
| C20-C31-C29 | 120.9 | 120.8(3) |
| C23-C21-C27 | 117.9 | 117.6(3) |
| C23-C21-C34 | 123.5 | 124.4(3) |
| C27-C21-C34 | 118.6 | 118(3)   |
| C21-C27-C37 | 121.4 | 122.6(3) |
| C21-C34-C38 | 120.5 | 120.4(3) |
| C22-C25-C29 | 119.9 | 119.4(3) |
| C25-C29-C31 | 119.2 | 119.3(3) |
| C25-C29-C36 | 120.5 | 120.8(3) |
| C27-C37-C39 | 118.9 | 117.2(3) |
| C28-C33-C30 | 119.8 | 120.5(3) |
| C31-C29-C36 | 120.2 | 119.9(3) |
| C34-C38-C39 | 119.8 | 119.8(3) |
| C37-C39-C38 | 120.7 | 122(3)   |

**Table S3:** Selected Torsion angles (°) of entitled compounds

| <b>4a</b>      | EXP       | <b>4b</b>      | EXP       |
|----------------|-----------|----------------|-----------|
| O6-C19-C18-C17 | 1.4(3)    | O6-C21-C20-C19 | 179.7(3)  |
| O6-C19-C18-C23 | -179.5(3) | O6-C21-C16-C11 | -3.1(3)   |
| O6-C19-C25-C29 | 4.0(3)    | O6-C21-C16-C17 | 179.4(3)  |
| O6-C19-C25-C24 | -175.2(2) | O6-C22-C23-C27 | -107.0(3) |
| O6-C20-C21-C17 | -5.2(3)   | O6-C22-C23-C24 | 69.2(3)   |
| O6-C20-C21-C22 | 177.4(3)  | O3-C8-C9-C11   | -5.4(3)   |
| N1-C20-C21-C17 | 178.0(3)  | O3-C8-C9-C10   | 177.9(3)  |
| N1-C20-C21-C22 | 0.6(4)    | O3-C8-C5-C4    | 4.9(3)    |
| O1-C9-C8-C7    | -1.4(3)   | O3-C8-C5-C6    | -176.8(2) |
| O1-C9-C8-C10   | 178.8(2)  | O3-C13-C12-C11 | 4.1(3)    |
| O1-C1-C6-C7    | -2.1(3)   | O3-C13-C12-C14 | -177.9(3) |
| O1-C1-C6-C5    | 179.8(3)  | O8-C27-C23-C24 | 4.7(3)    |
| O1-C1-C2-C3    | 179.9(3)  | O8-C27-C23-C22 | -179.0(3) |
| O3-C11-C16-C17 | 5.0(3)    | O8-C26-C25-C24 | 0.2(3)    |
| O3-C11-C16-C15 | -177.7(2) | O8-C26-C25-C31 | -179.3(3) |
| O3-C11-C12-C13 | 178.4(3)  | O8-C26-C28-C29 | 179.5(3)  |
| O3-C10-C8-C9   | -76.1(3)  | O1-C6-C5-C8    | 0.4(3)    |
| O3-C10-C8-C7   | 104.2(3)  | O1-C6-C5-C4    | 178.7(3)  |
| O4-C24-C25-C19 | -4.9(3)   | O1-C6-C7-C2    | -178.5(3) |
| O4-C24-C25-C29 | 175.9(3)  | O1-C10-C9-C11  | -178.7(2) |
| O4-C24-C26-C27 | -176.6(3) | O1-C10-C9-C8   | -1.9(3)   |
| O4-C23-C18-C19 | -6.0(3)   | O5-C14-C12-C11 | -5.3(3)   |
| O4-C23-C18-C17 | 173.2(2)  | O5-C14-C12-C13 | 176.7(2)  |
| O5-C23-C18-C19 | 174.7(3)  | O2-C10-C9-C11  | 2.8(4)    |
| O5-C23-C18-C17 | -6.1(4)   | O2-C10-C9-C8   | 179.6(3)  |

|                 |           |                 |           |
|-----------------|-----------|-----------------|-----------|
| O2-C9-C8-C7     | 177.5(3)  | O7-C27-C23-C24  | -176.8(3) |
| O2-C9-C8-C10    | -2.3(3)   | O7-C27-C23-C22  | -0.5(4)   |
| C16-C11-C12-C13 | -1.2(3)   | O4-C14-C12-C11  | 173.8(3)  |
| C16-C17-C18-C19 | 114.0(2)  | O4-C14-C12-C13  | -4.2(4)   |
| C16-C17-C18-C23 | -65.2(3)  | N1-C13-C12-C11  | -175.3(3) |
| C16-C17-C21-C20 | -113.4(2) | N1-C13-C12-C14  | 2.7(4)    |
| C16-C17-C21-C22 | 63.9(3)   | C21-C20-C19-C18 | 0.6(4)    |
| C16-C15-C14-C13 | -0.5(4)   | C21-C16-C11-C9  | 57.5(3)   |
| C11-C12-C13-C14 | -0.4(4)   | C21-C16-C11-C12 | -66.5(3)  |
| C19-C18-C17-C21 | -11.0(3)  | C21-C16-C17-C18 | 1.0(3)    |
| C19-C25-C29-C28 | -177.4(3) | C9-C11-C12-C13  | -13.5(3)  |
| C19-C25-C24-C26 | 75.7(2)   | C9-C11-C12-C14  | 168.5(2)  |
| C18-C17-C21-C20 | 12.9(3)   | C9-C11-C16-C17  | -125.0(2) |
| C18-C17-C21-C22 | -169.8(2) | C9-C8-C5-C4     | -173.0(3) |
| C25-C29-C28-C27 | 0.7(3)    | C9-C8-C5-C6     | 5.3(3)    |
| C25-C24-C26-C27 | 2.8(3)    | C11-C16-C17-C18 | -176.6(3) |
| C29-C28-C27-C26 | -1.5(3)   | C5-C4-C3-C2     | 1.4(3)    |
| C29-C28-C27-C30 | 177.8(3)  | C5-C6-C7-C2     | 0.9(4)    |
| C24-C26-C27-C28 | -0.2(3)   | C17-C18-C19-C20 | -0.9(4)   |
| C24-C26-C27-C30 | -179.5(3) | C23-C24-C25-C26 | -1.6(3)   |
| C9-C8-C7-C6     | 1.1(3)    | C23-C24-C25-C31 | 177.9(3)  |
| C12-C13-C14-C15 | 1.3(4)    | C4-C3-C2-C7     | -1.1(4)   |
| C1-C6-C7-C8     | 0.6(3)    | C4-C3-C2-C1     | 178.1(3)  |
| C1-C6-C5-C4     | 0.1(3)    | C25-C26-C28-C29 | 0.1(4)    |
| C1-C2-C3-C4     | 0.5(4)    | C25-C31-C30-C29 | 1.1(4)    |
| C8-C7-C6-C5     | 178.5(3)  | C6-C7-C2-C3     | -0.0(4)   |
| C6-C5-C4-C3     | 0.1(4)    | C6-C7-C2-C1     | -179.2(3) |
| C5-C4-C3-C2     | -0.4(4)   | C26-C28-C29-C30 | 0.3(4)    |
|                 |           | C31-C30-C29-C28 | -0.9(5)   |

**Table S4:** The results of these parameters, including electron affinity ( $EA$ ), ionization potential ( $I$ ), global hardness ( $\eta$ ), global electrophilicity ( $\omega$ ), electronegativity ( $X$ ), chemical potential ( $\mu$ ) and global softness ( $\sigma$ ), are estimated with the help of Equations and their outcomes are tabulated

$$IP = -E_{HOMO} \quad (5)$$

$$EA = -E_{LUMO} \quad (6)$$

$$X = -\frac{[E_{LUMO} + E_{HOMO}]}{2} \quad (7)$$

$$\eta = -\frac{[E_{LUMO} - E_{HOMO}]}{2} \quad (8)$$

$$\mu = \frac{E_{HOMO} + E_{LUMO}}{2} \quad (9)$$

$$\sigma = \frac{1}{2\eta} \quad (10)$$

$$\omega = \frac{\mu^2}{2\eta} \quad (11)$$

**Table S5:** Natural bond orbital (NBO) analysis of investigated compound **4a**

| Comp.   | Donor( <i>i</i> ) | Type    | Acceptor( <i>j</i> ) | Type  | $E^{(2)a}$ [kcal/mol] | $E(j) - E(i)^b$ (a.u.) |
|---------|-------------------|---------|----------------------|-------|-----------------------|------------------------|
| C27-C33 | $\pi$             | C12-C17 | $\pi^*$              | 34.85 | 0.34                  | 0.1                    |
| C35-C37 | $\pi$             | C22-C29 | $\pi^*$              | 32.24 | 0.35                  | 0.097                  |
| C9-C21  | $\pi$             | C23-C32 | $\pi^*$              | 30.54 | 0.37                  | 0.095                  |
| C8-C24  | $\pi$             | C9-C21  | $\pi^*$              | 29.64 | 0.35                  | 0.092                  |
| C12-C17 | $\pi$             | C13-C28 | $\pi^*$              | 27.03 | 0.38                  | 0.092                  |
| C22-C29 | $\pi$             | C34-C38 | $\pi^*$              | 25.91 | 0.38                  | 0.09                   |
| C34-C38 | $\pi$             | C22-C29 | $\pi^*$              | 24.89 | 0.34                  | 0.085                  |
| C35-C37 | $\pi$             | C34-C38 | $\pi^*$              | 23.43 | 0.37                  | 0.084                  |
| C27-C33 | $\pi$             | C13-C28 | $\pi^*$              | 22.89 | 0.36                  | 0.082                  |
| C12-C17 | $\pi$             | C10-C11 | $\pi^*$              | 21.52 | 0.38                  | 0.084                  |
| C22-C29 | $\pi$             | C26-C30 | $\pi^*$              | 19.31 | 0.38                  | 0.082                  |
| C26-C30 | $\pi$             | C22-C29 | $\pi^*$              | 12.31 | 0.38                  | 0.065                  |
| C10-C11 | $\pi$             | C12-C17 | $\pi^*$              | 11.28 | 0.39                  | 0.063                  |
| C14-C15 | $\pi$             | C14-C15 | $\pi^*$              | 7.52  | 0.39                  | 0.051                  |
| O6-C18  | $\pi$             | C10-C11 | $\pi^*$              | 5.04  | 0.53                  | 0.049                  |
| O7-C20  | $\pi$             | C26-C30 | $\pi^*$              | 4.8   | 0.54                  | 0.047                  |
| C10-C11 | $\pi$             | C10-C11 | $\pi^*$              | 2.1   | 0.41                  | 0.027                  |
| C12-C17 | $\pi$             | C12-C17 | $\pi^*$              | 1.21  | 0.35                  | 0.019                  |
| C14-C15 | $\pi$             | C8-C24  | $\pi^*$              | 0.72  | 0.41                  | 0.016                  |
| C8-C24  | $\pi$             | C14-C15 | $\pi^*$              | 0.56  | 0.34                  | 0.013                  |
| C11-C18 | $\sigma$          | O1-C10  | $\sigma^*$           | 6.8   | 1.2                   | 0.081                  |
| C14-C25 | $\sigma$          | O1-C15  | $\sigma^*$           | 6.51  | 1.21                  | 0.079                  |
| C21-C23 | $\sigma$          | O4-C9   | $\sigma^*$           | 5.63  | 1.21                  | 0.074                  |
| C27-H39 | $\sigma$          | C12-C17 | $\sigma^*$           | 5.11  | 1.21                  | 0.07                   |
| C21-H45 | $\sigma$          | C8-C9   | $\sigma^*$           | 4.92  | 1.22                  | 0.069                  |

|         |          |         |            |       |      |       |
|---------|----------|---------|------------|-------|------|-------|
| C8-C24  | $\sigma$ | C8-C9   | $\sigma^*$ | 4.08  | 1.4  | 0.068 |
| C36-H58 | $\sigma$ | C27-C33 | $\sigma^*$ | 3.98  | 1.21 | 0.062 |
| C12-C17 | $\sigma$ | O1-C10  | $\sigma^*$ | 3.87  | 1.22 | 0.061 |
| C26-C31 | $\sigma$ | O3-C20  | $\sigma^*$ | 3.74  | 1.13 | 0.059 |
| C21-C23 | $\sigma$ | C9-C21  | $\sigma^*$ | 3.51  | 1.4  | 0.063 |
| C26-C30 | $\sigma$ | C26-C31 | $\sigma^*$ | 3.38  | 1.32 | 0.06  |
| C9-C21  | $\sigma$ | C8-C16  | $\sigma^*$ | 3.3   | 1.26 | 0.058 |
| C10-C12 | $\sigma$ | O1-C15  | $\sigma^*$ | 3.28  | 1.19 | 0.056 |
| C29-C30 | $\sigma$ | C22-C29 | $\sigma^*$ | 2.94  | 1.37 | 0.057 |
| N2-C15  | $\sigma$ | C14-C16 | $\sigma^*$ | 2.38  | 1.41 | 0.052 |
| O1-C15  | $\sigma$ | N2-H51  | $\sigma^*$ | 2.07  | 1.59 | 0.051 |
| O1-C10  | $\sigma$ | C11-C18 | $\sigma^*$ | 1.92  | 1.55 | 0.049 |
| O5-C17  | $\sigma$ | C12-C13 | $\sigma^*$ | 1.69  | 1.66 | 0.047 |
| C27-H39 | $\sigma$ | C17-C27 | $\sigma^*$ | 1.06  | 1.22 | 0.032 |
| O7-C20  | $\sigma$ | C26-C30 | $\sigma^*$ | 0.98  | 1.9  | 0.039 |
| C31-H55 | $\sigma$ | C26-C31 | $\sigma^*$ | 0.65  | 1.07 | 0.024 |
| C26-C31 | $\sigma$ | C31-H54 | $\sigma^*$ | 0.51  | 1.23 | 0.022 |
| N2      | LP(1)    | C14-C15 | $\pi^*$    | 77.62 | 0.36 | 0.153 |
| O3      | LP(2)    | O7-C20  | $\pi^*$    | 52.97 | 0.45 | 0.139 |
| O5      | LP(2)    | O6-C18  | $\pi^*$    | 46.77 | 0.45 | 0.132 |
| O6      | LP(2)    | O5-C18  | $\sigma^*$ | 45.47 | 0.72 | 0.164 |
| O7      | LP(2)    | O3-C20  | $\sigma^*$ | 38.74 | 0.76 | 0.155 |
| O3      | LP(2)    | C22-C29 | $\pi^*$    | 34.3  | 0.46 | 0.117 |
| O4      | LP(2)    | C9-C21  | $\pi^*$    | 30.42 | 0.45 | 0.112 |
| O7      | LP(2)    | C20-C26 | $\sigma^*$ | 20.85 | 0.85 | 0.122 |
| N19     | LP(1)    | C14-C25 | $\sigma^*$ | 12.49 | 1.2  | 0.109 |
| O5      | LP(1)    | C12-C17 | $\sigma^*$ | 8.17  | 1.24 | 0.09  |
| O3      | LP(1)    | C22-C29 | $\sigma^*$ | 7.63  | 1.25 | 0.087 |
| O1      | LP(1)    | C14-C15 | $\sigma^*$ | 6.94  | 1.31 | 0.085 |
| O4      | LP(2)    | C31-H54 | $\sigma^*$ | 4.04  | 0.9  | 0.055 |
| O6      | LP(1)    | C11-C18 | $\sigma^*$ | 3.36  | 1.3  | 0.06  |
| O3      | LP(1)    | O7-C20  | $\sigma^*$ | 2.99  | 1.31 | 0.056 |
| O7      | LP(1)    | C20-C26 | $\sigma^*$ | 1.89  | 1.29 | 0.044 |
| O5      | LP(1)    | C17-C27 | $\sigma^*$ | 0.98  | 1.26 | 0.032 |
| O4      | LP(2)    | C8-C9   | $\sigma^*$ | 0.71  | 1.02 | 0.025 |
| O4      | LP(2)    | C26-C31 | $\sigma^*$ | 0.7   | 0.87 | 0.023 |
| O4      | LP(1)    | C31-H55 | $\sigma^*$ | 0.66  | 1.15 | 0.025 |

LP= lone pair, (i) donor; (j) acceptor; E(2) means energy of hyper conjugative interaction (stabilization energy); E(j) - E(i) is the energy difference between donor and acceptor i and j NBO orbitals; F(i, j) is the Fock matrix element between i and j NBO orbitals.

**Table S6:** Natural bond orbital (NBO) analysis of investigated compound **4b**

| Comp. | Donor(i) | Type | Acceptor(j) | Type | $E^{(2)a}$ [kcal/mol] | $E(j) - E(i)^b$ (a.u.) |
|-------|----------|------|-------------|------|-----------------------|------------------------|
|-------|----------|------|-------------|------|-----------------------|------------------------|

---

|         |          |         |            |       |      |       |
|---------|----------|---------|------------|-------|------|-------|
| C16-C19 | $\pi$    | O8-C33  | $\pi^*$    | 34.95 | 0.37 | 0.106 |
| C31-C37 | $\pi$    | C17-C27 | $\pi^*$    | 34.78 | 0.34 | 0.099 |
| C54-C58 | $\pi$    | C26-C34 | $\pi^*$    | 31.26 | 0.35 | 0.096 |
| C47-C56 | $\pi$    | C54-C58 | $\pi^*$    | 29.85 | 0.36 | 0.093 |
| C13-C18 | $\pi$    | O6-C30  | $\pi^*$    | 28.79 | 0.39 | 0.098 |
| C12-C49 | $\pi$    | C38-C45 | $\pi^*$    | 27.77 | 0.36 | 0.09  |
| C38-C45 | $\pi$    | C20-C35 | $\pi^*$    | 26.34 | 0.37 | 0.088 |
| C47-C56 | $\pi$    | C26-C34 | $\pi^*$    | 25.09 | 0.35 | 0.086 |
| C54-C58 | $\pi$    | C47-C56 | $\pi^*$    | 24.25 | 0.37 | 0.085 |
| C31-C37 | $\pi$    | C24-C40 | $\pi^*$    | 22.98 | 0.36 | 0.082 |
| C17-C27 | $\pi$    | C31-C37 | $\pi^*$    | 20.63 | 0.38 | 0.081 |
| C26-C34 | $\pi$    | C22-C28 | $\pi^*$    | 17.68 | 0.39 | 0.079 |
| C22-C28 | $\pi$    | C26-C34 | $\pi^*$    | 13.09 | 0.38 | 0.067 |
| C13-C18 | $\pi$    | C17-C27 | $\pi^*$    | 11.26 | 0.39 | 0.063 |
| C16-C19 | $\pi$    | C16-C19 | $\pi^*$    | 7.13  | 0.39 | 0.049 |
| O7-C23  | $\pi$    | C22-C28 | $\pi^*$    | 5.21  | 0.54 | 0.049 |
| O6-C30  | $\pi$    | C13-C18 | $\pi^*$    | 4.95  | 0.53 | 0.048 |
| C17-C27 | $\pi$    | C17-C27 | $\pi^*$    | 1.09  | 0.36 | 0.018 |
| O6-C30  | $\pi$    | O6-C30  | $\pi^*$    | 0.87  | 0.51 | 0.02  |
| O7-C23  | $\pi$    | O7-C23  | $\pi^*$    | 0.78  | 0.51 | 0.019 |
| C13-C30 | $\sigma$ | O2-C18  | $\sigma^*$ | 6.82  | 1.19 | 0.08  |
| N9-H11  | $\sigma$ | C16-C19 | $\sigma^*$ | 5.51  | 1.39 | 0.078 |
| C20-H21 | $\sigma$ | C12-C49 | $\sigma^*$ | 4.87  | 1.22 | 0.069 |
| C40-H41 | $\sigma$ | C31-C37 | $\sigma^*$ | 4.43  | 1.24 | 0.066 |
| C35-H36 | $\sigma$ | C38-C45 | $\sigma^*$ | 4.01  | 1.23 | 0.063 |
| C47-C56 | $\sigma$ | C26-C28 | $\sigma^*$ | 3.99  | 1.35 | 0.066 |
| C20-C35 | $\sigma$ | C14-C49 | $\sigma^*$ | 3.92  | 1.23 | 0.062 |
| C22-C23 | $\sigma$ | C22-C28 | $\sigma^*$ | 3.64  | 1.48 | 0.065 |
| C13-C14 | $\sigma$ | C16-C33 | $\sigma^*$ | 3.27  | 1.24 | 0.057 |
| C14-C49 | $\sigma$ | C12-C38 | $\sigma^*$ | 2.98  | 1.32 | 0.056 |
| C34-C54 | $\sigma$ | C54-C58 | $\sigma^*$ | 2.65  | 1.44 | 0.055 |
| C12-C49 | $\sigma$ | C20-H21 | $\sigma^*$ | 2.24  | 1.34 | 0.049 |
| C26-C34 | $\sigma$ | C54-H55 | $\sigma^*$ | 1.98  | 1.35 | 0.046 |
| C13-C14 | $\sigma$ | C13-C30 | $\sigma^*$ | 1.82  | 1.21 | 0.042 |
| C24-C40 | $\sigma$ | C24-H25 | $\sigma^*$ | 1.74  | 1.34 | 0.043 |
| C13-C30 | $\sigma$ | C14-C16 | $\sigma^*$ | 1.39  | 1.25 | 0.037 |
| C14-H15 | $\sigma$ | C14-C16 | $\sigma^*$ | 1.09  | 1.04 | 0.03  |
| O3-C34  | $\sigma$ | C26-C34 | $\sigma^*$ | 0.84  | 1.65 | 0.033 |
| C13-C18 | $\sigma$ | O2-C18  | $\sigma^*$ | 0.67  | 1.27 | 0.026 |
| C22-C28 | $\sigma$ | C42-H43 | $\sigma^*$ | 0.51  | 1.34 | 0.023 |
| O5      | LP(2)    | O8-C33  | $\pi^*$    | 59.26 | 0.43 | 0.148 |
| O3      | LP(2)    | O7-C23  | $\pi^*$    | 49.71 | 0.45 | 0.135 |
| O6      | LP(2)    | O4-C30  | $\sigma^*$ | 45.22 | 0.73 | 0.164 |

|    |       |         |            |       |      |       |
|----|-------|---------|------------|-------|------|-------|
| O8 | LP(2) | O5-C33  | $\sigma^*$ | 37.65 | 0.79 | 0.156 |
| O4 | LP(2) | C17-C27 | $\pi^*$    | 35.94 | 0.45 | 0.119 |
| O3 | LP(2) | C26-C34 | $\pi^*$    | 34.52 | 0.45 | 0.117 |
| O6 | LP(2) | C13-C30 | $\sigma^*$ | 20.83 | 0.84 | 0.121 |
| O7 | LP(2) | C22-C23 | $\sigma^*$ | 20.79 | 0.84 | 0.121 |
| O5 | LP(1) | O8-C33  | $\sigma^*$ | 8.77  | 1.3  | 0.096 |
| O4 | LP(1) | C17-C27 | $\sigma^*$ | 8.1   | 1.24 | 0.09  |
| O1 | LP(2) | C42-H43 | $\sigma^*$ | 7.96  | 0.95 | 0.079 |
| O3 | LP(1) | C22-C23 | $\sigma^*$ | 6.82  | 1.13 | 0.079 |
| O5 | LP(2) | C60-H61 | $\sigma^*$ | 5.53  | 0.92 | 0.067 |
| O1 | LP(1) | C42-H44 | $\sigma^*$ | 4.42  | 1.11 | 0.063 |
| O8 | LP(1) | N9-H10  | $\sigma^*$ | 3.88  | 1.35 | 0.065 |
| O3 | LP(1) | O7-C23  | $\sigma^*$ | 2.83  | 1.32 | 0.055 |
| O1 | LP(2) | C12-C38 | $\sigma^*$ | 1.95  | 1.08 | 0.042 |
| O4 | LP(1) | C27-C31 | $\sigma^*$ | 0.99  | 1.26 | 0.032 |
| O5 | LP(1) | C13-C14 | $\sigma^*$ | 0.61  | 1.13 | 0.023 |
| O8 | LP(1) | O5-C60  | $\sigma^*$ | 0.5   | 1.14 | 0.021 |

LP= lone pair, (i) donor; (j) acceptor; E(2) means energy of hyper conjugative interaction (stabilization energy); E(j) - E(i) is the energy difference between donor and acceptor i and j NBO orbitals; F(i, j) is the Fock matrix element between i and j NBO orbitals.

**Table S7:** Computed transition energy ( $eV$ ), absorption wavelengths ( $nm$ ), oscillator strengths ( $f_{os}$ ) and transition natures of compounds **4a** and **4b**

| Comp.     | $\lambda_{max}(nm)$ | $E(eV)$ | $f_{os}$ | MO contributions           |
|-----------|---------------------|---------|----------|----------------------------|
| <b>4a</b> | 328.923             | 3.769   | 0.0021   | H→L (89%), H-1→L+1 (8%)    |
|           | 306.634             | 4.043   | 0.0044   | H→L+1 (83%), H-1→L+2 (8%)  |
|           | 293.336             | 4.226   | 0.018    | H→L+1 (89%), H-1→L+2 (6%)  |
|           | 290.558             | 4.267   | 0.036    | H→L+1 (81%), H-1→L+2 (5%)  |
|           | 278.504             | 4.452   | 0.027    | H→L+1 (18%), H-1→L+2 (47%) |
|           | 268.579             | 4.616   | 0.337    | H-1→L (68%), H→L (2%)      |
| <b>4b</b> | 292.498             | 4.239   | 0.012    | H→L (39%), H-1→L+1 (50%)   |
|           | 271.300             | 4.570   | 0.124    | H→L+1 (23%), H-1→L+2 (10%) |
|           | 269.513             | 4.600   | 0.374    | H→L+1 (36%), H-1→L+2 (30%) |
|           | 256.951             | 4.825   | 0.015    | H→L+1 (43%), H-1→L+2 (10%) |
|           | 251.494             | 4.929   | 0.039    | H→L+1 (18%), H-1→L+2 (12%) |
|           | 249.134             | 4.976   | 0.007    | H-1→L (31%), H→L (16%)     |

<sup>a</sup>DFT

**Table S8:** The dipole moment ( $D$ ) and linear polarizability ( $esu$ ) values for compounds (**4a** and **4b**)

|             | <b>4a</b> | <b>4b</b> |                        | <b>4a</b> $\times 10^{-23}$ | <b>4b</b> $\times 10^{-23}$ |
|-------------|-----------|-----------|------------------------|-----------------------------|-----------------------------|
| $\mu_{xx}$  | -5.874    | -1.621    | $\alpha_{xx}$          | 9.678                       | 8.990                       |
| $\mu_{yy}$  | -0.328    | -2.752    | $\alpha_{yy}$          | 6.448                       | 6.962                       |
| $\mu_{zz}$  | 2.067     | -0.632    | $\alpha_{zz}$          | 4.185                       | 4.146                       |
| $\mu_{tot}$ | 6.236     | 3.256     | $\langle\alpha\rangle$ | 6.770                       | 6.699                       |

**Table S9:** The second hyperpolarizability ( $\gamma_{\text{tot}}$ ) major contributing tensors for compounds (**4a** and **4b**)

| $\gamma$              | <b>4a</b> $\times 10^4$ | <b>4b</b> $\times 10^4$ |
|-----------------------|-------------------------|-------------------------|
| $\gamma_{xx}$         | 0.102                   | 8.907                   |
| $\gamma_{yy}$         | 2.054                   | 3.515                   |
| $\gamma_{zz}$         | 2.324                   | 2.031                   |
| $\gamma_{\text{tot}}$ | 0.145                   | 0.145                   |

$\gamma$  = Second hyperpolarizability (*esu*)

**Table S10:** Calculated vibrational frequencies of compound **4a**

| <sup>a</sup> <i>Freq</i> | <sup>a</sup> <i>I</i> <sub>IR</sub> | <i>Exp</i> | Vibrational assignments                                                                                     |
|--------------------------|-------------------------------------|------------|-------------------------------------------------------------------------------------------------------------|
| 3742                     | 120                                 |            | $\nu(\text{as})(\text{N-H})$                                                                                |
| 3700                     | 501                                 |            | $\nu(\text{N-H}) + \nu(\text{C-H})$                                                                         |
| 3509                     | 495                                 | 5376       | $\nu(\text{s})(\text{N-H})$                                                                                 |
| 3232                     | 7                                   | 3372       | $\nu(\text{s}) \text{C-H}_{\text{Ben}}$                                                                     |
| 3222                     | 20                                  | 3323       | $\nu(\text{s}) + \nu(\text{as}) \text{C-H}_{\text{Ben}}$                                                    |
| 3209                     | 7                                   |            | $\nu(\text{s}) + \nu(\text{as}) \text{C-H}_{\text{Ben}}$                                                    |
| 3207                     | 5                                   |            | $\nu(\text{s})\text{C-H}_{\text{Ben}}$                                                                      |
| 3188                     | 12                                  | 3175       | $\nu(\text{as}) \text{C-H}_{\text{Ben}}$                                                                    |
| 3161                     | 10                                  |            | $\nu(\text{as}) \text{C-H}_{\text{CH}_3}$                                                                   |
| 3106                     | 62                                  |            | $\nu(\text{as}) \text{C-H}_{\text{CH}_3}$                                                                   |
| 3072                     | 21                                  |            | $\nu(\text{s}) \text{C-H}_{\text{CH}_3}$                                                                    |
| 3056                     | 22                                  |            | $\nu(\text{s}) \text{C-H}_{\text{CH}_2}$                                                                    |
| 3043                     | 77                                  | 2908       | $\nu(\text{s}) \text{C-H}_{\text{CH}_3}$                                                                    |
| 2377                     | 113                                 | 2381       | $\nu(\text{C-N})$                                                                                           |
| 1887                     | 559                                 |            | $\nu(\text{C-O})$                                                                                           |
| 1845                     | 588                                 |            | $\nu(\text{C-O})$                                                                                           |
| 1775                     | 528                                 | 1719       | $\nu(\text{C-N}) + \nu(\text{C-C}) + \nu(\text{C=C-C=O}_{\text{pyr}})$                                      |
| 1724                     | 72                                  |            | $\nu(\text{C=C-C=O}_{\text{pyr}}) + \nu(\delta)(\text{N-H})$                                                |
| 1711                     | 110                                 |            | $\nu(\text{C=C-C=C}_{\text{Ben}}) + \nu(\delta) \text{C-H}_{\text{Ben}}$                                    |
| 1701                     | 28                                  |            | $\nu(\text{C=C-C=C}_{\text{Ben}})$                                                                          |
| 1665                     | 27                                  | 1691       | $\nu(\rho) \text{C-H}_{\text{Ben}} + \nu(\text{C=C-C=C}_{\text{Ben}})$                                      |
| 1644                     | 182                                 | 1609       | $\nu(\delta)(\text{N-H}) + \nu(\text{C=C-C=O}_{\text{pyr}})$                                                |
| 1550                     | 10                                  |            | $\nu(\rho) \text{C-H}_{\text{Ben}} + \nu(\text{C=C-C=C}_{\text{Ben}})$                                      |
| 1519                     | 22                                  |            | $\nu(\rho) \text{C-H}_{\text{CH}_2} + \nu(\rho) \text{C-H}_{\text{Ben}} + \nu(\text{C=C-C=C}_{\text{Ben}})$ |
| 1509                     | 55                                  |            | $\nu(\rho) \text{C-H}_{\text{Ben}} + \nu(\delta) \text{C-H}$                                                |
| 1479                     | 10                                  |            | $\nu(\rho) \text{C-H}_{\text{Ben}} + \nu(\text{C=C-C=C}_{\text{Ben}}) + \nu(w) \text{C-H}_{\text{CH}_3}$    |
| 1444                     | 321                                 | 1490       | $\nu(\rho) \text{C-H}_{\text{Ben}} + \nu(\text{C=C-C=O}_{\text{pyr}})$                                      |
| 1435                     | 49                                  | 1452       | $\nu(w) \text{C-H}_{\text{CH}_2} + \nu(\rho) \text{C-H}_{\text{Ben}}$                                       |
| 1422                     | 77                                  |            | $\nu(\rho) \text{C-O} + \nu(w) \text{C-H}_{\text{CH}_3}$                                                    |
| 1389                     | 21                                  |            | $\nu(\rho) \text{C-H}_{\text{Ben}} + \nu(\text{C=C-C=C}_{\text{Ben}})$                                      |
| 1385                     | 39                                  | 1375       | $\nu(\rho) \text{C-H}_{\text{Ben}} + \nu(\text{C=C-C=C}_{\text{Ben}})$                                      |
| 1358                     | 25                                  |            | $\nu(\rho) \text{C-H}_{\text{Ben}} + \nu(\text{C=C-C=O}_{\text{pyr}})$                                      |
| 1315                     | 187                                 |            | $\nu(\rho) \text{C-H}_{\text{Ben}}$                                                                         |
| 1289                     | 41                                  | 1260       | $\nu(\rho) \text{C-H}_{\text{Ben}} + \nu(\text{C-C=C-O}_{\text{pyr}})$                                      |

|      |     |      |                                                                                                                      |
|------|-----|------|----------------------------------------------------------------------------------------------------------------------|
| 1253 | 38  |      | $\nu(\rho)\text{N-H} + \nu(\text{C-C=C-O}_{\text{pyr}})$                                                             |
| 1228 | 81  | 1232 | $\nu(\rho)\text{C-H}_{\text{Ben}} + \nu(\rho)\text{C-H}_{\text{CH}_2}$                                               |
| 1192 | 11  |      | $\nu(\rho)\text{C-H}_{\text{Ben}} + \nu(\text{C-C=C-C}_{\text{Ben}}) + \nu(\rho) + (\delta)\text{C-H}_{\text{CH}_3}$ |
| 1138 | 89  | 1177 | $\nu(\rho)\text{C-H} + \nu(\rho)\text{C-H}_{\text{CH}_3}$                                                            |
| 1120 | 118 | 1118 | $\nu(\rho)\text{C-H} + \nu(\rho)\text{C-H}_{\text{CH}_3} + \nu(\text{C-C=C-O}_{\text{pyr}})$                         |
| 1089 | 58  |      | $\nu(\rho) + (\delta)\text{C-H}_{\text{Ben}} + \nu(\text{C-C=C-C}_{\text{Ben}})$                                     |
| 1059 | 13  | 1072 | $\nu(\rho)\text{C-H}_{\text{CH}_2} + \gamma(\text{C-H})$                                                             |
| 994  | 16  | 951  | $\nu(\tau)\text{C-H}_{\text{CH}_2} + \nu(\rho)\text{C-H}_{\text{Ben}}$                                               |
| 978  | 14  | 922  | $\nu(\tau) + (w)\text{C-H}_{\text{Ben}}$                                                                             |
| 892  | 20  |      | $\nu(\text{C=C-C=C}_{\text{Ben}}) + \nu(\tau)\text{C-H}_{\text{Ben}}$                                                |
| 845  | 10  | 861  | $\nu(\gamma)\text{C-H}_{\text{Ben}} + \nu(w)\text{C-H}_{\text{Ben}}$                                                 |
| 838  | 32  | 815  | $\nu(\text{C=C-C=C}_{\text{Ben}}) \nu(w) + (\tau)\text{C-H}_{\text{Ben}}$                                            |
| 775  | 71  |      | $\nu(\gamma)\text{N-H} + \nu(w)\text{C-H}_{\text{Ben}}$                                                              |
| 765  | 44  | 766  | $\nu(\text{C=C-C=C}_{\text{Ben}}) + \nu(\gamma)\text{N-H} + \nu(\gamma)\text{O-H}$                                   |
| 606  | 11  | 645  | $\nu(\text{C=C-C=C}_{\text{Ben}}) + \nu(\gamma)\text{N-H}$                                                           |
| 573  | 19  | 612  | $\nu(\text{C=C-C=C}_{\text{Ben}}) + \nu(\gamma)\text{N-H} + \nu(\gamma)\text{O-H}$                                   |

Frequencies are given in  $\text{cm}^{-1}$ ,  $\nu$ =stretching,  $\beta$ =in-plane bending,  $\gamma$ =out-plane bending,  $\delta$ =scissoring,  $\rho$ =rocking,  $w$ =wagging,  $s$ =symmetric,  $as$ =asymmetric,  $\tau$ =twisting, Ben=benzene ring, pyr = pyran structure Exp=Experimental values

**Table S11:** Calculated vibrational frequencies of compound **4b**

| <i><sup>a</sup>Freq</i> | <i><sup>a</sup>I<sub>IR</sub></i> | <i>Exp</i> | <b>Vibrational assignments</b>                       |
|-------------------------|-----------------------------------|------------|------------------------------------------------------|
| 3710                    | 91.8                              |            | $\nu(\text{N-H})$                                    |
| 3538                    | 135                               | 3466       | $\nu(\text{N-H})$                                    |
| 3250                    | 4                                 | 3325       | $\nu(s)\text{C-H}_{\text{Ben}}$                      |
| 3242                    | 9                                 |            | $\nu(s) + \nu(as)\text{C-H}_{\text{Ben}}$            |
| 3241                    | 18                                |            | $\nu(s)\text{C-H}_{\text{Ben}}$                      |
| 3231                    | 14                                |            | $\nu(s) + \nu(as)\text{C-H}_{\text{Ben}}$            |
| 3221                    | 5                                 |            | $\nu(as)\text{C-H}_{\text{Ben}}$                     |
| 3206                    | 12                                |            | $\nu(s) + \nu(as)\text{C-H}_{\text{CH}_3}$           |
| 3173                    | 18                                |            | $\nu(as)\text{C-H}_{\text{CH}_3}$                    |
| 3148                    | 14                                |            | $\nu(s) + \nu(as)\text{C-H}_{\text{CH}_3}$           |
| 3092                    | 38                                |            | $\nu(s)\text{C-H}_{\text{CH}_3}$                     |
| 3081                    | 18                                |            | $\nu(as)\text{C-H}_{\text{CH}_2}$                    |
| 3075                    | 15                                |            | $\nu(s)\text{C-H}_{\text{CH}_3}$                     |
| 3045                    | 11                                |            | $\nu(s)\text{C-H}_{\text{CH}_2}$                     |
| 1889                    | 553                               |            | $\nu(\text{C-O})$                                    |
| 1879                    | 474                               |            | $\nu(\text{C-O})$                                    |
| 1815                    | 346                               |            | $\nu(\text{C-O}) + \nu(\text{C-C})$                  |
| 1769                    | 289                               | 1716       | $\nu(\text{C=C-C-O}_{\text{pyr}}) + \nu(\text{C-O})$ |
| 1710                    | 241                               |            | $\nu(\text{C=C-C-O}_{\text{pyr}}) + \nu(\text{C-O})$ |
| 1700                    | 40                                |            | $\nu(\text{C=C-C=C}_{\text{Ben}})$                   |



|      |     |      |                                                                                                                                                     |
|------|-----|------|-----------------------------------------------------------------------------------------------------------------------------------------------------|
| 1693 | 10  | 1688 | $\nu(\rho) + \nu(\delta) \text{C-H}_{\text{Ben}} + \nu(\text{C}=\text{C}-\text{C}=\text{C}_{\text{Ben}})$                                           |
| 1662 | 13  |      | $\nu(\rho) \text{C-H}_{\text{Ben}} + \nu(\text{C}=\text{C}-\text{C}=\text{C}_{\text{Ben}})$                                                         |
| 1655 | 12  | 1656 | $\nu(\rho) \text{C-H}_{\text{Ben}} + \nu(\text{C}=\text{C}-\text{C}=\text{C}_{\text{Ben}})$                                                         |
| 1592 | 189 |      | $\nu(\delta) \text{N-H} + \nu(\rho) \text{C-H}_{\text{Ben}}$                                                                                        |
| 1568 | 108 | 1572 | $\nu(\rho) \text{C-H}_{\text{Ben}} + \nu(\text{C}=\text{C}-\text{C}=\text{C}_{\text{Ben}}) + \nu(\delta) \text{N-H}$                                |
| 1506 | 43  |      | $\nu(\rho) \text{C-H}_{\text{Ben}} + \nu(\text{C}=\text{C}-\text{C}=\text{C}_{\text{Ben}}) + \nu(\delta) \text{C-H}$                                |
| 1497 | 63  | 1489 | $\nu(w) \text{C-H}_{\text{CH}_3}$                                                                                                                   |
| 1450 | 67  |      | $\nu(w) \text{C-H}_{\text{CH}_2}$                                                                                                                   |
| 1433 | 303 | 1440 | $\nu(\delta) \text{N-H} + \nu(\text{C}-\text{C}=\text{C}-\text{O}_{\text{pyr}})$                                                                    |
| 1380 | 267 | 1375 | $\nu(\rho) \text{N-H} + \nu(w) \text{C-H}_{\text{CH}_3} + \nu(\text{C}=\text{C}-\text{C}=\text{C}_{\text{Ben}})$                                    |
| 1345 | 140 |      | $\nu(w) \text{C-H}_{\text{CH}_3} + \nu(\text{C}=\text{C}-\text{C}=\text{C}_{\text{Ben}}) + \nu(\rho) \text{N-H} + \nu(\text{C}-\text{O})$           |
| 1303 | 134 |      | $\nu(\rho) \text{C-H}_{\text{Ben}} + \nu(\text{C}=\text{C}-\text{C}=\text{C}_{\text{Ben}})$                                                         |
| 1278 | 34  | 1283 | $\nu(\rho) \text{N-H} + \nu(\rho) \text{C-H} + \nu(\text{C}-\text{C}=\text{C}-\text{O}_{\text{pyr}})$                                               |
| 1246 | 171 |      | $\nu(\rho) \text{N-H} + \nu(\rho) \text{C-H}_{\text{Ben}} + \nu(\text{C}-\text{C}=\text{C}-\text{O}_{\text{pyr}})$                                  |
| 1221 | 160 |      | $\nu(\delta) \text{C-H}_{\text{Ben}} + \nu(\rho) \text{C-H}_{\text{Ben}} + \nu(\rho) \text{N-H}$                                                    |
| 1197 | 51  |      | $\nu(\rho) \text{C-H}_{\text{Ben}} + \nu(\text{C}-\text{C}=\text{C}-\text{C}_{\text{Ben}}) + \nu(\rho) \text{C-H}_{\text{CH}_3}$                    |
| 1170 | 63  | 1178 | $\nu(\rho) \text{C-H} + \nu(\rho) \text{C-H}_{\text{CH}_3}$                                                                                         |
| 1104 | 213 | 1147 | $\nu(\rho) \text{N-H} + \nu(\rho) \text{C-H} + \nu(\text{C}-\text{C}=\text{C}-\text{O}_{\text{pyr}})$                                               |
| 1075 | 75  | 1071 | $\nu(\rho) \text{C-H}_{\text{Ben}} + \nu(\text{C}-\text{C}=\text{C}-\text{C}_{\text{Ben}}) + \nu(\text{C}-\text{C}=\text{C}-\text{O}_{\text{pyr}})$ |
| 1042 | 5   |      | $\nu(\rho) \text{C-H}_{\text{CH}_2} + \gamma(\text{C}-\text{H})$                                                                                    |
| 980  | 19  | 976  | $\nu(\tau) \text{C-H}_{\text{CH}_2} + \nu(\tau) + \nu(w) \text{C-H}_{\text{Ben}}$                                                                   |
| 955  | 21  | 954  | $\nu(\tau) \text{C-H}_{\text{CH}_2} + \nu(\tau) + \nu(w) \text{C-H}_{\text{Ben}}$                                                                   |
| 884  | 8   | 867  | $\nu(\text{C}=\text{C}-\text{C}=\text{C}_{\text{Ben}}) + \nu(\tau) \text{C-H}_{\text{Ben}}$                                                         |
| 837  | 37  |      | $\nu(\gamma) \text{C-H}_{\text{Ben}} + \nu(w) \text{C-H}_{\text{Ben}}$                                                                              |
| 832  | 13  | 812  | $\nu(\text{C}=\text{C}-\text{C}=\text{C}_{\text{Ben}}) \nu(\rho) \text{C-H}_{\text{Ben}}$                                                           |
| 791  | 44  | 757  | $\nu(\text{C}=\text{C}-\text{C}=\text{C}_{\text{Ben}}) + \nu(\gamma) \text{N-H}$                                                                    |
| 735  | 13  |      | $\nu(w) \text{C-H}_{\text{CH}_3} + \nu(\text{C}=\text{C}-\text{C}=\text{C}_{\text{Ben}}) + \nu(\gamma) \text{N-H}$                                  |
| 659  | 38  | 644  | $\nu(\text{C}=\text{C}-\text{C}=\text{C}_{\text{Ben}}) + \nu(\gamma) \text{N-H}$                                                                    |
| 543  | 18  |      | $\nu(\text{C}=\text{C}-\text{C}=\text{C}_{\text{Ben}}) + \nu(\gamma) \text{N-H}$                                                                    |

Frequencies are given in  $\text{cm}^{-1}$ ,  $\nu$ =stretching,  $\beta$ =in-plane bending,  $\gamma$ =out-plane bending  
 $\delta$ =scissoring,  $\rho$ =rocking,  $w$ =wagging,  $s$ =symmetric,  $as$ =asymmetric,  $\tau$ =twisting, Ben=benzene ring, pyr = pyran structure

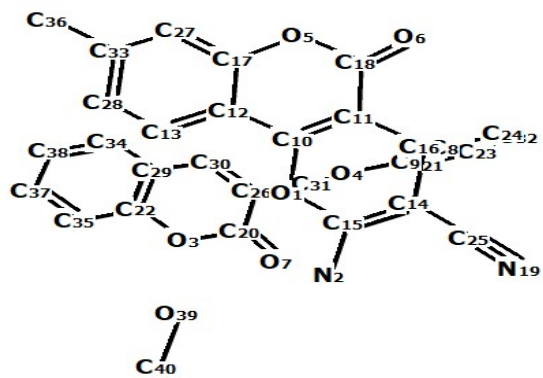

XRD

4a

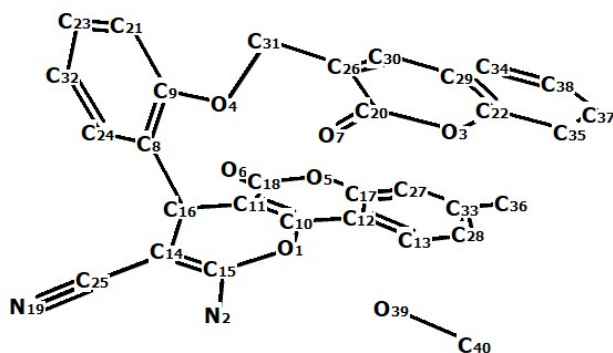

DFT

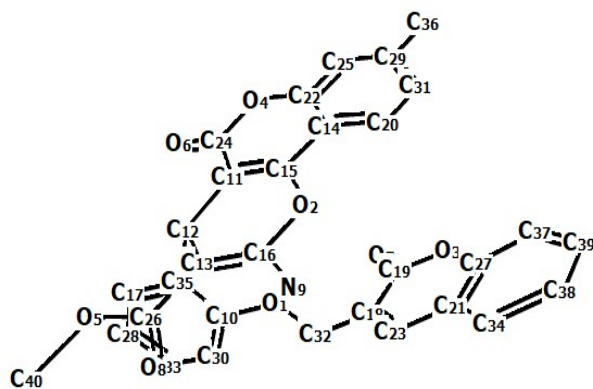

XRD

4b

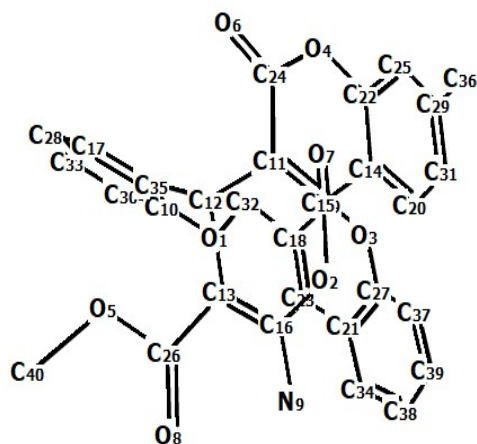

DFT

Figure S7: Geometrical structures of studied compounds (4a and 4b)

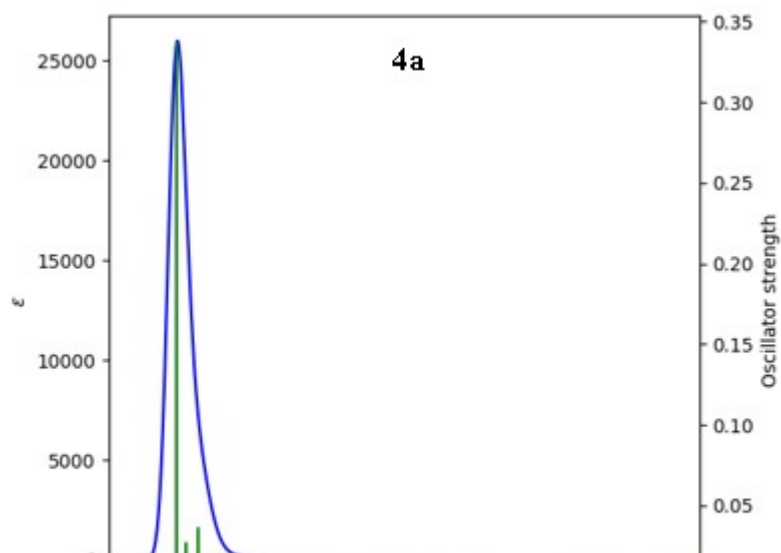

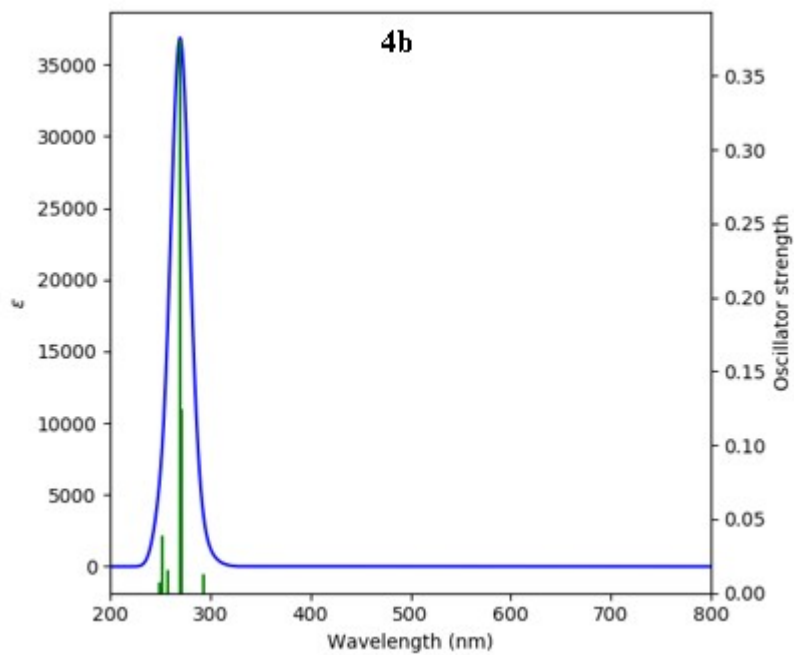

Figure S8: UV-vis graphs of 4a and 4b

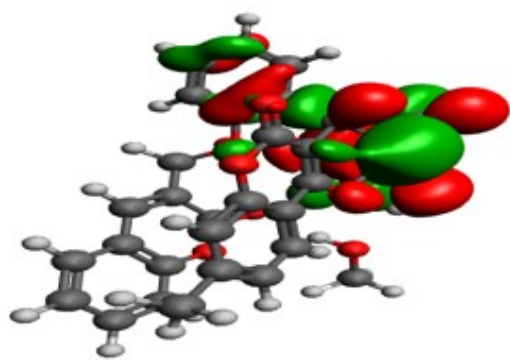

HOMO

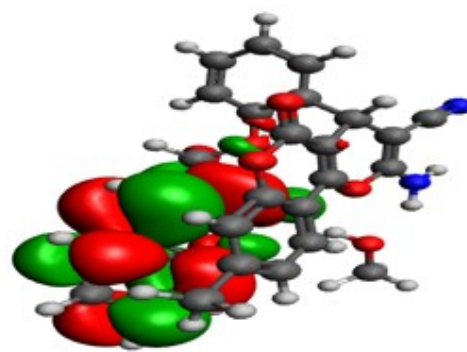

LUMO

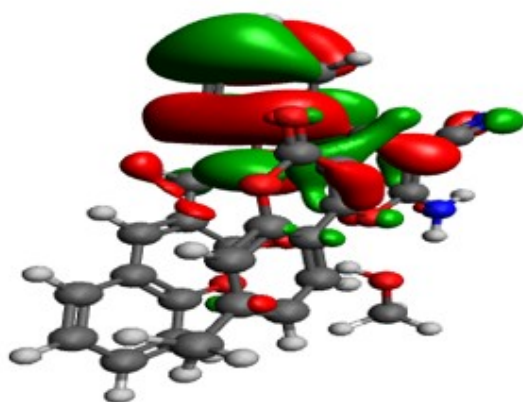

HOMO-1

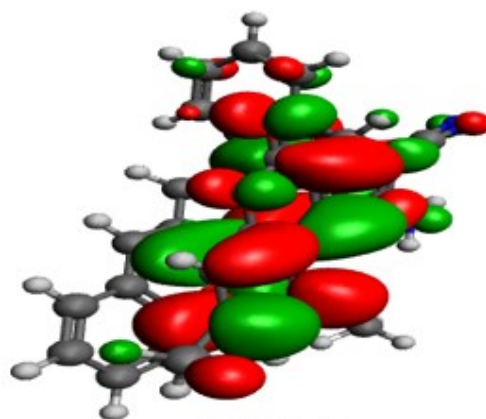

LUMO+1

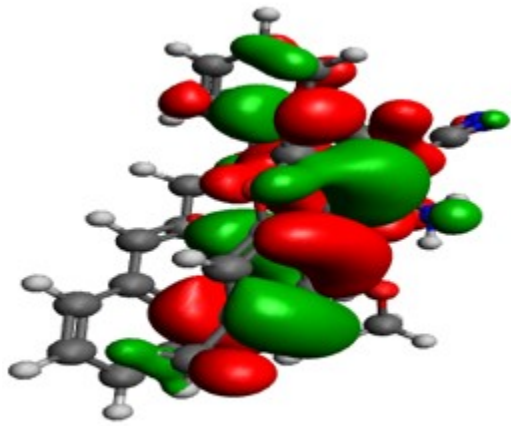

HOMO-2

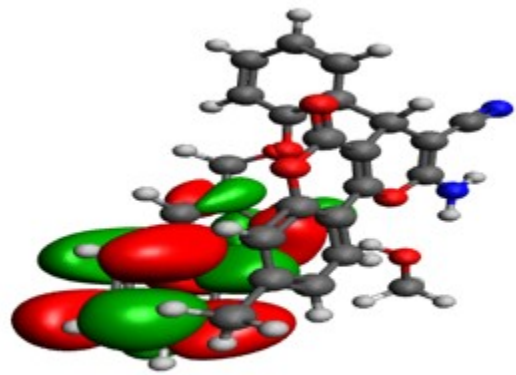

LUMO+2

4a

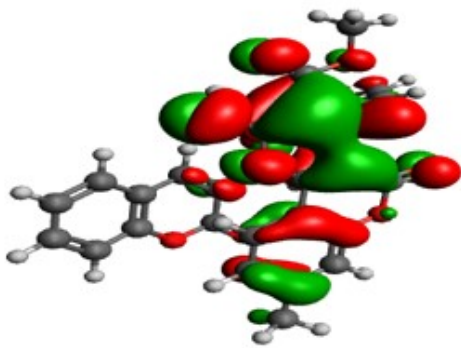

HOMO

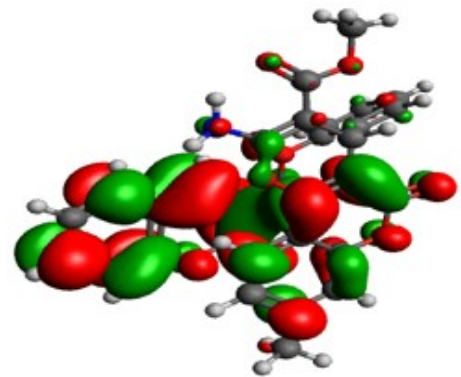

LUMO

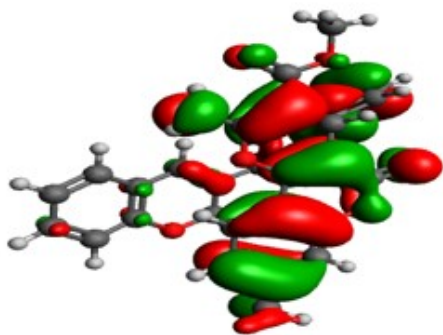

HOMO-1

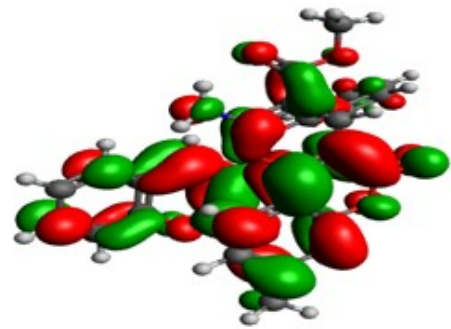

LUMO+1

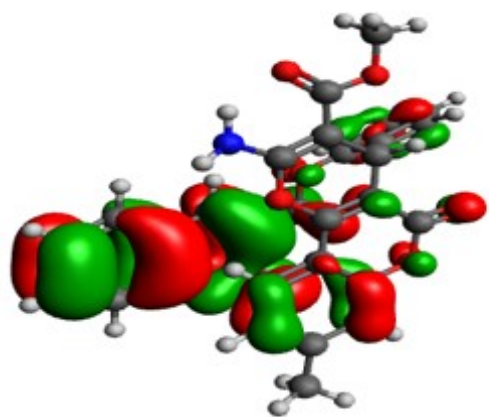

HOMO-2

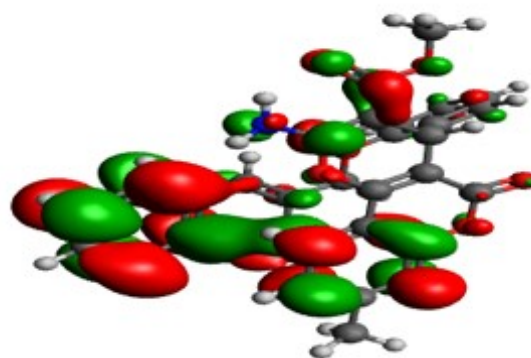

LUMO+2

4b

Figure S9: The HOMO-LUMO structures of 4a and 4b

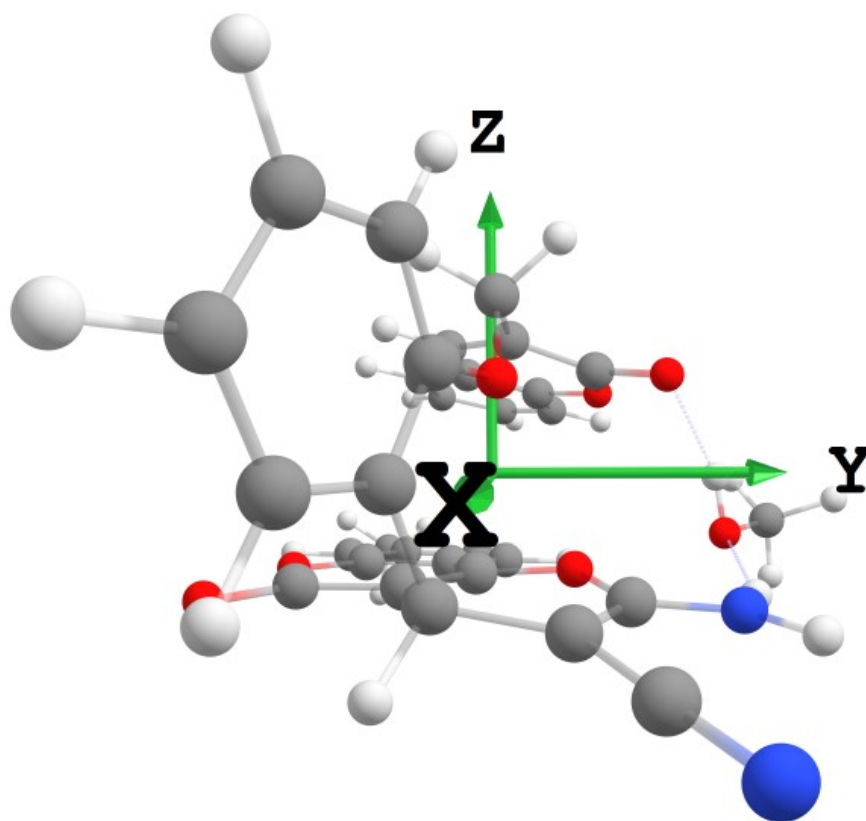

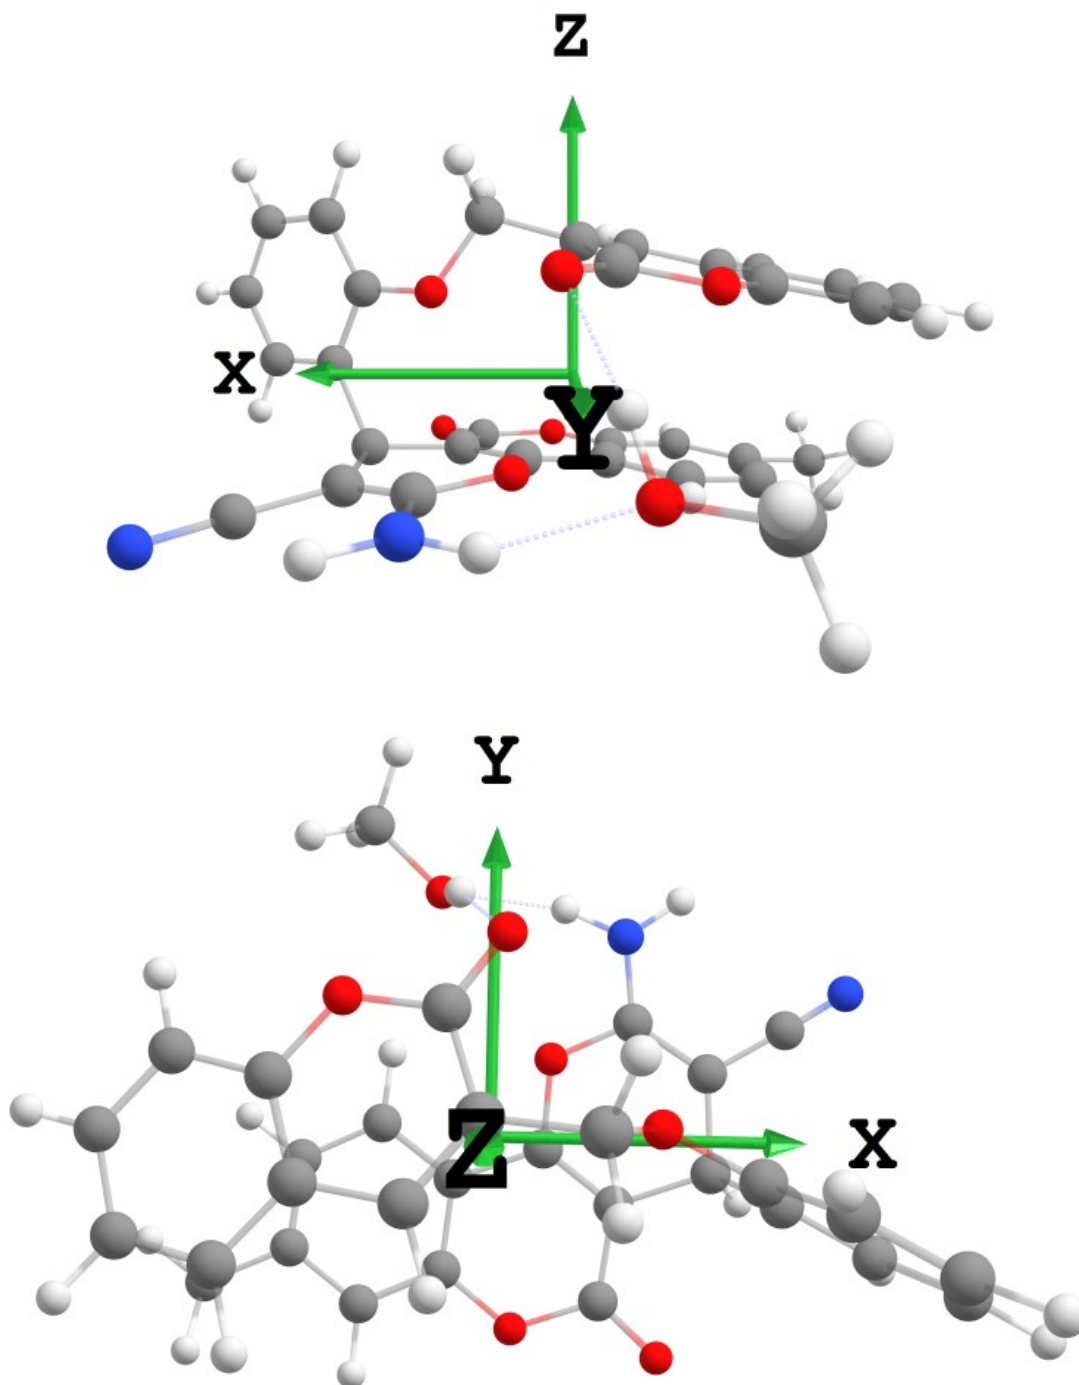

**Figure S10:** Orientation of the 4a molecule along x,y and z axis.

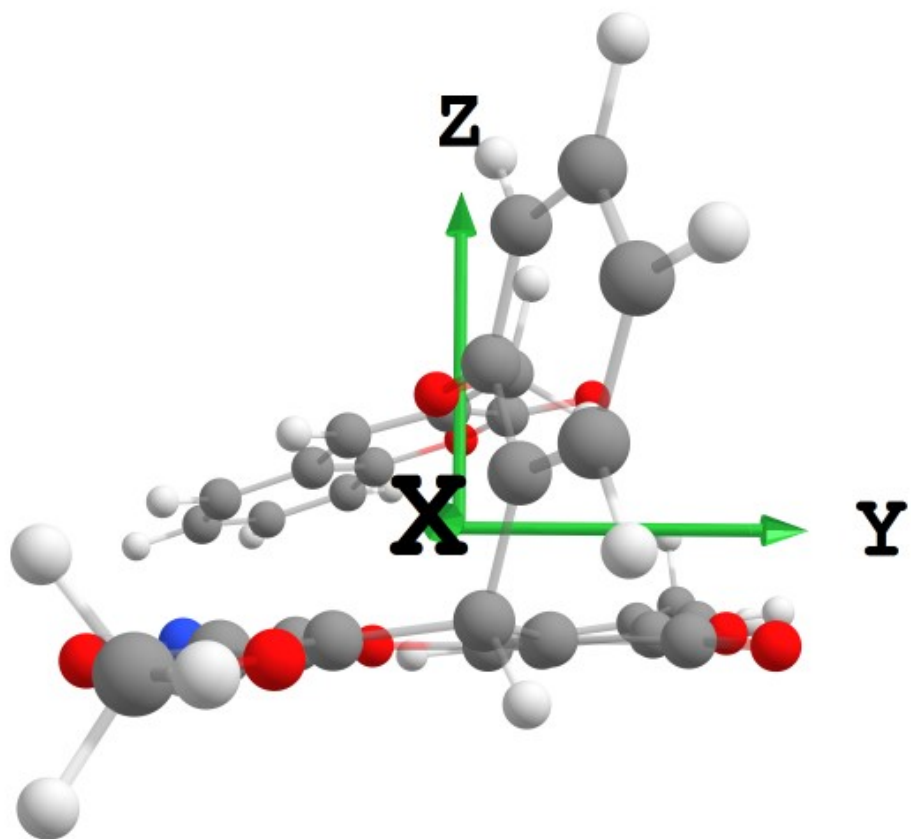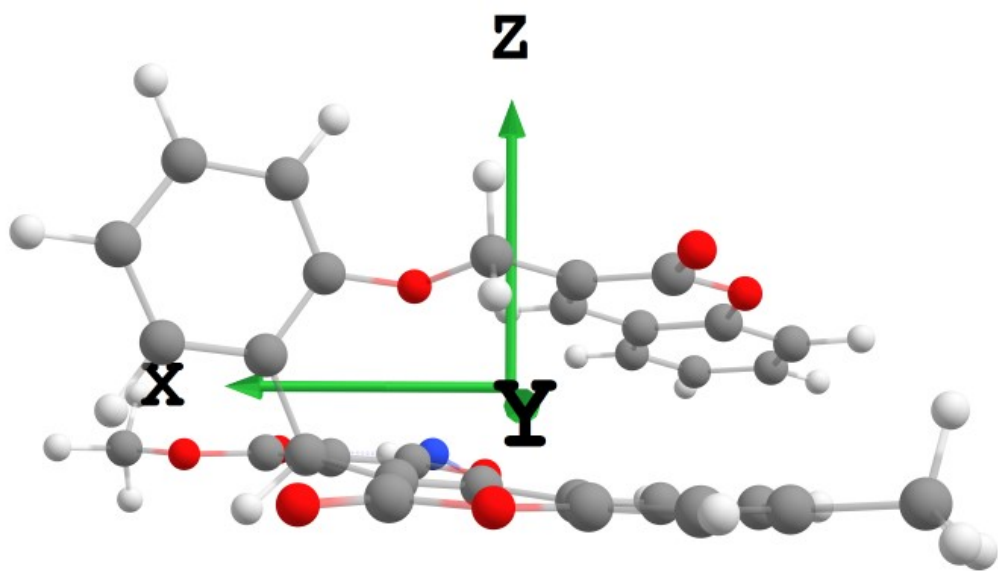

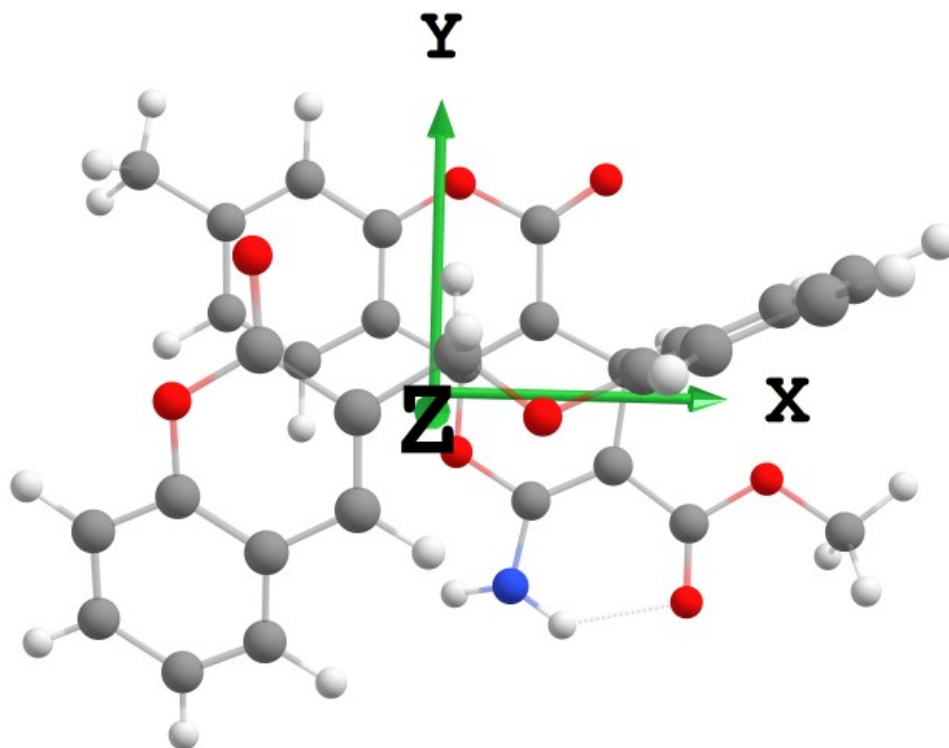

**Figure S11:** Orientation of the **4b** molecule along x,y and z axis.
